# Supplementary material for: Kaempferol attenuates diquat-induced oxidative damage and apoptosis in intestinal porcine epithelial cells
Source: Royal Society of Chemistry journal article supplement (doi:10.1039/d1fo00402f), 2021-01-01
Supplement: d1fo00402f1.pdf [file d1fo00402f1.pdf]

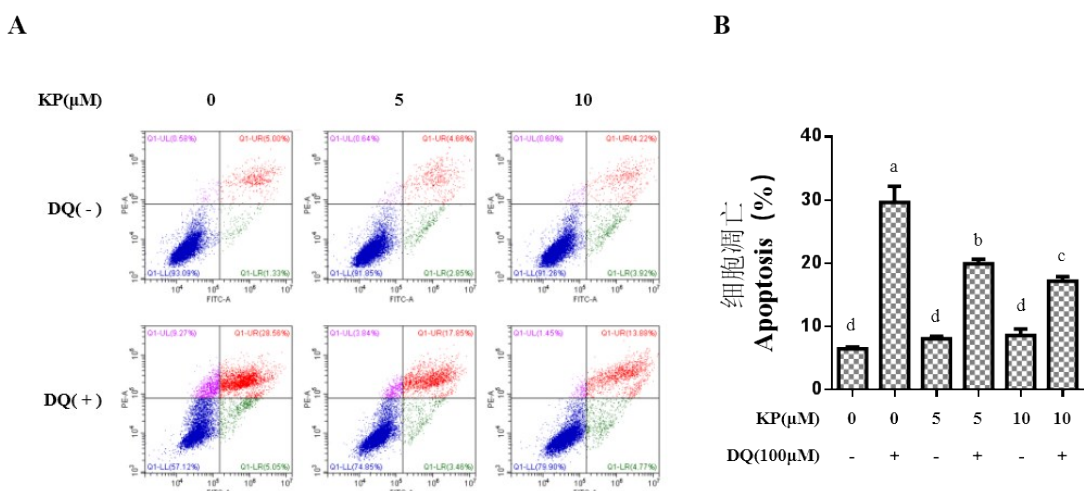

Supplemental Fig.1 Kaempferol attenuated diquat-induced apoptosis in IPEC-1 cells. (A) Apoptosis was determined and (B) analyzed as described.

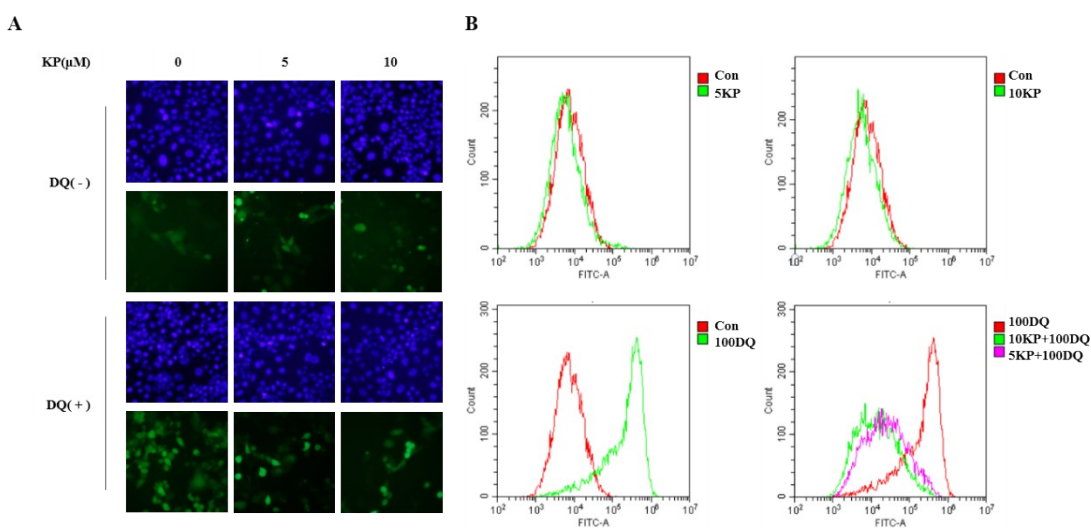

Supplemental Fig.2 Kaempferol blocked diquat-induced ROS generation in IPEC-1 cells. (A) The images were taken under a fluorescence microscope (magnification 400 ×) (B) ROS content was determined by the DCFH-DA assay, and DCFH-DA positive populations were determined by the flow cytometry analysis.
